# Supplementary material for: Novel laser model of optic nerve transection provides valuable insights about the dynamics of optic nerve regeneration
Source: Research Square preprint supplement (doi:10.21203/rs.3.rs-5085599/v1), 2024-11-02
Supplement: Supplementary file 1 [file 85b8bda96e35923c273e810f.docx]

**Supplementary Data Legends**

**Supplementary Data S1:** Results of gene expression analysis in retinas with injured optic nerve compared to retinas with intact optic nerve.

**Supplementary Data S2:** Results of gene expression analysis in injured optic nerves compared with intact optic nerves.

**Supplementary Movie M1:** Three-dimensional structure of the tadpole head after completion of optic nerve regeneration.
